# Supplementary material
Source: publisher site journal article supplement (https://www.dovepress.com/article/454578)
Supplement: Supplementary file 1 [file get_supplementary_file.php]

Supplementary 1: Search terms and the article list obtained by the literature review

**Search terms:**

((night) or (nighttime) or (nigh-time)) AND ((communicat*) or (collaborat*) or (coordinat*)) AND (nurs*) AND ((physician) or (doctor))

PubMed: 120 results (last search: December 2022)

CINAHL: 81 results (last search: December 2022)

**List of literature review:**

We reviewed the titles and content for the above results and obtained the following 17 articles relevant to nighttime physician–nurse collaboration.

1. Al-Qadheeb, N. S., Hoffmeister, J., Roberts, R., Shanahan, K., Garpestad, E., & Devlin, J. W. (2013). Perceptions of nurses and physicians of their communication at night about intensive care patients’ pain, agitation, and delirium. In *Am J Crit Care* (Vol. 22, Issue 5, pp. e49–e61). <https://doi.org/10.4037/ajcc2013565>
2. Benda, N. C., Hettinger, A. Z., Bisantz, A. M., Hoffman, D. J., McGeorge, N. M., Iyer, A., Berg, R. L., Roth, E. M., Franklin, E. S., Perry, S. J., Wears, R. L., & Fairbanks, R. J. (2017). Communication in the Electronic Age: An Analysis of Face-to-Face Physician-Nurse Communication in the Emergency Department. In *J Healthc Inform Res* (Vol. 1, Issue 2, pp. 218–230). <https://doi.org/10.1007/s41666-017-0008-3>
3. Bettinelli, M., Lei, Y., Beane, M., Mackey, C., & Liesching, T. N. (2015). Does Robotic Telerounding Enhance Nurse-Physician Collaboration Satisfaction About Care Decisions? In *Telemed J E Health* (Vol. 21, Issue 8, pp. 637–643). <https://doi.org/10.1089/tmj.2014.0162>
4. Gonzalo, J. D., Moser, E., Lehman, E., & Kuperman, E. (2014). Quality and safety during the off hours in medicine units: A mixed methods study of front-line provider perspectives. In *J Hosp Med* (Vol. 9, Issue 12, pp. 756–763). <https://doi.org/10.1002/jhm.2261>
5. Hanson, J. T., Leykum, L. K., Pugh, J. A., & McDaniel, R. R. (2015). Nighttime clinical encounters: How residents perceive and respond to calls at night. In *J Hosp Med* (Vol. 10, Issue 3, pp. 142–146). <https://doi.org/10.1002/jhm.2315>
6. Harvey, R., Jarrett, P. G., & Peltekian, K. M. (1994). Patterns of paging medical interns during night calls at two teaching hospitals. In *CMAJ* (Vol. 151, Issue 3, pp. 307–311).
7. Lauffenburger, J. C., Coll, M. D., Kim, E., Robertson, T., Oran, R., Haff, N., Hanken, K., Avorn, J., & Choudhry, N. K. (2022). Prescribing decision making by medical residents on night shifts: A qualitative study. In *Med Educ* (Vol. 56, Issue 10, pp. 1032–1041). <https://doi.org/10.1111/medu.14845>
8. Li, L., Hou, Y., Kang, F., Li, S., & Zhao, J. (2020). General phenomenon and communication experience of physician and nurse in night shift communication: A qualitative study. In *J Nurs Manag* (Vol. 28, Issue 4, pp. 903–911). <https://doi.org/10.1111/jonm.13018>
9. Parrado, R. H., Notrica, D. M., & Molitor, M. S. (2022). Nighttime calls, pages, and interruptions to the on-call surgery resident. In *Am Surg* (Vol. 88, Issue 6, pp. 1181–1186). <https://doi.org/10.1177/0003134821991987>
10. Rosenthal, L. (2013). Enhancing communication between night shift RNs and hospitalists: An opportunity for performance improvement. In *J Nurs Adm* (Vol. 43, Issue 2, pp. 59–61). <https://doi.org/10.1097/NNA.0b013e31827f200b>
11. Schröder, A., Farhat, W. A., Bägli, D. J., Lorenzo, A. J., & Koyle, M. A. (2020). Turning a new “page”: Ways to decrease the number of pages after hours without compromising patient care. In *Can J Surg* (Vol. 63, Issue 2, pp. E155–E160). <https://doi.org/10.1503/cjs.009119>
12. Storino, A., Polanco-Santana, J. C., Allar, B. G., Fakler, M. N., Wong, D., Whyte, R., Gangadharan, S. P., & Kent, T. S. (2021). Paging patterns among junior surgery residents in a tertiary care center. In *J Surg Educ* (Vol. 78, Issue 5, pp. 1483–1491). <https://doi.org/10.1016/j.jsurg.2021.02.009>
13. Sun, A. J., Wang, L., Go, M., Eggers, Z., Deng, R., Maggio, P., & Shieh, L. (2018). Night-time communication at Stanford University Hospital: Perceptions, reality and solutions. In *BMJ Qual Saf* (Vol. 27, Issue 2, pp. 156–162). <https://doi.org/10.1136/bmjqs-2017-006727>
14. White, C., & Del Rey, J. G. (2009). Decreasing adverse events through night talks: An interdisciplinary, hospital-based quality improvement project. In *Perm J* (Vol. 13, Issue 4, pp. 16–22). <https://doi.org/10.7812/TPP/09-076>
15. Wu, R. C., Morra, D., Quan, S., Lai, S., Zanjani, S., Abrams, H., & Rossos, P. G. (2010). The use of smartphones for clinical communication on internal medicine wards. In *J Hosp Med* (Vol. 5, Issue 9, pp. 553–559). <https://doi.org/10.1002/jhm.775>
16. Young, J. B., Baker, A. C., Boehmer, J. K., Briede, K. M., Thomas, S. A., Patzer, C. L., Pineda, C., Cates, G. A., & Galante, J. M. (2012). Using NNAPPS (Nighttime Nurse and Physician Paging System) to Maximize Resident Call Efficiency within 2011 Accreditation Council for Graduate Medical Education (ACGME) work hour restrictions. In *J Surg Educ* (Vol. 69, Issue 6, pp. 819–825). <https://doi.org/10.1016/j.jsurg.2012.08.010>
17. Zhu, J., Stadeli, K. M., Pandit, K., Zech, J., Ludwig, A., Harris, K., Naughton, H., Yi, J., Davidson, G. H., & Kritek, P. A. (2020). Standardizing nightly huddles with surgical residents and nurses to improve interdisciplinary communication and teamwork. In *Am J Surg* (Vol. 219, Issue 5, pp. 769–775). <https://doi.org/10.1016/j.amjsurg.2020.03.002>

Supplementary 2: THE INTERVIEW GUIDE

Pre-interview

1. Give participants a Research Information Form in advance and confirm their consent to participate in the study.

Interview contents

1. Greeting and self-introduction
2. Confirm the purpose of the study

- Again confirm that the participant has read the research information form given in advance.
- Provide additional clarification as appropriate, if needed.

1. Definition of clinical deterioration

- Clinical deterioration is defined as “a dynamic state experienced by a patient compromising hemodynamic stability, marked by physiological decompensation accompanied by subjective or objective findings.” 1

1. Main part of the interview

- Now, we will begin the interview. Would you mind if we recorded the conversation for an accurate analysis of the interview content?
- First of all, may I know how night duty at your hospital usually works? (working hours, number of physicians, cross-coverage, physician-to-physician handover, naps, etc.)
- Please tell us what problems or barriers you encounter when you need to interact with nurses at night to address a patient's condition, especially clinical deterioration. Also, if you have had to interact with a nurse regarding a patient's condition during your most recent night shift, please describe the situation.

(specific questions, if needed)

- - What do you think about the content and methods of communication with the nurses at night?
  - How do you feel about your duties and workload while on duty (time of day, dealing with outpatients and other wards, conflicts with naps/rest, etc.)?
  - What kind of patient-related problems do you encounter during the night?
  - Are there any specific instances where you felt that you did not work well with the nurses during a patient aggravation event at night?
- Is there anything you are devising or taking care of to address such issues?

(specific questions, if needed)

- - What do you keep in mind when working with nurses during the night?
  - Have you ever had an experience where you felt you worked well with a nurse at night? And in what situations was this the case?
- Do you feel that the unique culture, unspoken rules, or systems of the hospital or ward have influenced your practice regarding nighttime collaboration? If so, what are they?

1. End of interview

This concludes the interview. Thank you so much for taking time out of your busy schedule today to cooperate with our research survey.

References

1. Padilla RM, Mayo AM. Clinical deterioration: A concept analysis. *Journal of Clinical Nursing*. 2018;27(7-8):1360-1368. doi:10.1111/jocn.14238
